# Supplementary material
Source: PubMed Central journal article supplement (PMC4562506)

## **SUPPLEMENTAL MATERIAL**

### **ANGIOTENSIN-(1-7) ADMINISTRATION BENEFITS CARDIAC, RENAL, AND PROGENITOR CELL FUNCTION IN *db/db* MICE**

Anna M. Papinska\*, Nicholas M. Mordwinkin\*, Christopher J. Meeks, Sachin S. Jadhav, and Kathleen E. Rodgers

University of Southern California  
School of Pharmacy

Abbreviated title: ANGIOTENSIN-(1-7) AND DIABETIC COMPLICATIONS

Correspondence to:  
Kathleen E. Rodgers  
University of Southern California  
1985 Zonal Ave., PSC 530  
Los Angeles, CA 90033, USA  
Tel: 323-442-2574  
Email: [krodgers@pharmacy.usc.edu](mailto:krodgers@pharmacy.usc.edu)

\*These authors contributed equally to the paper.

## Supplemental Figures

### Figure I

**Effects of Ang-(1-7) on cardiomyocyte hypertrophy.** Representative images of heart sections stained with hematoxylin and eosin showing cardiomyocyte size.

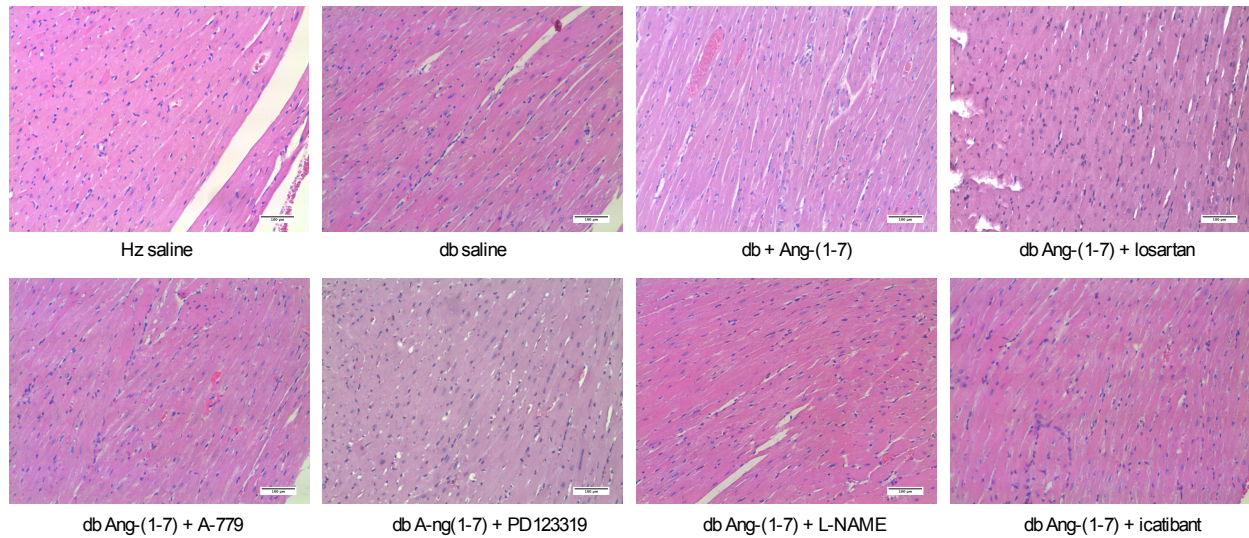

### Figure II

**Effects of Ang-(1-7) on glomerular hypertrophy and mesangial expansion.** Representative pictures of kidney sections at 40x stained with periodic acid Schiff stain.

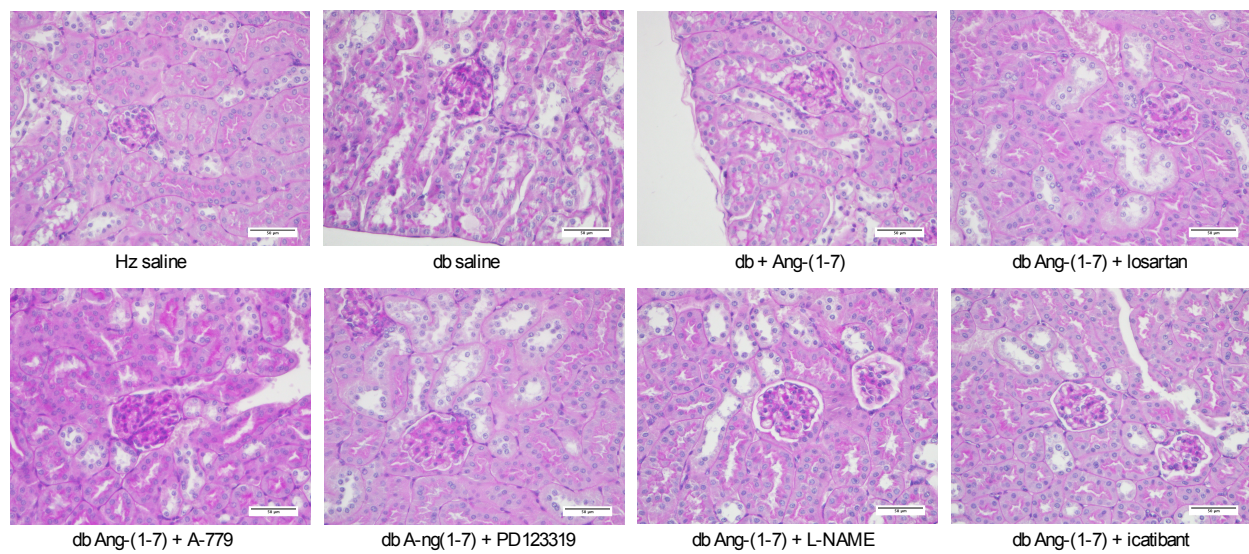

**Figure III**

**Phosphorylation of eNOS and formation of nitrotyrosine in the kidneys.** Representative images of kidney sections at 40x stained for nitrotyrosine, phospho-eNOS Ser1177 and phospho-eNOS Thr495. Sections were stained using immunohistochemistry.

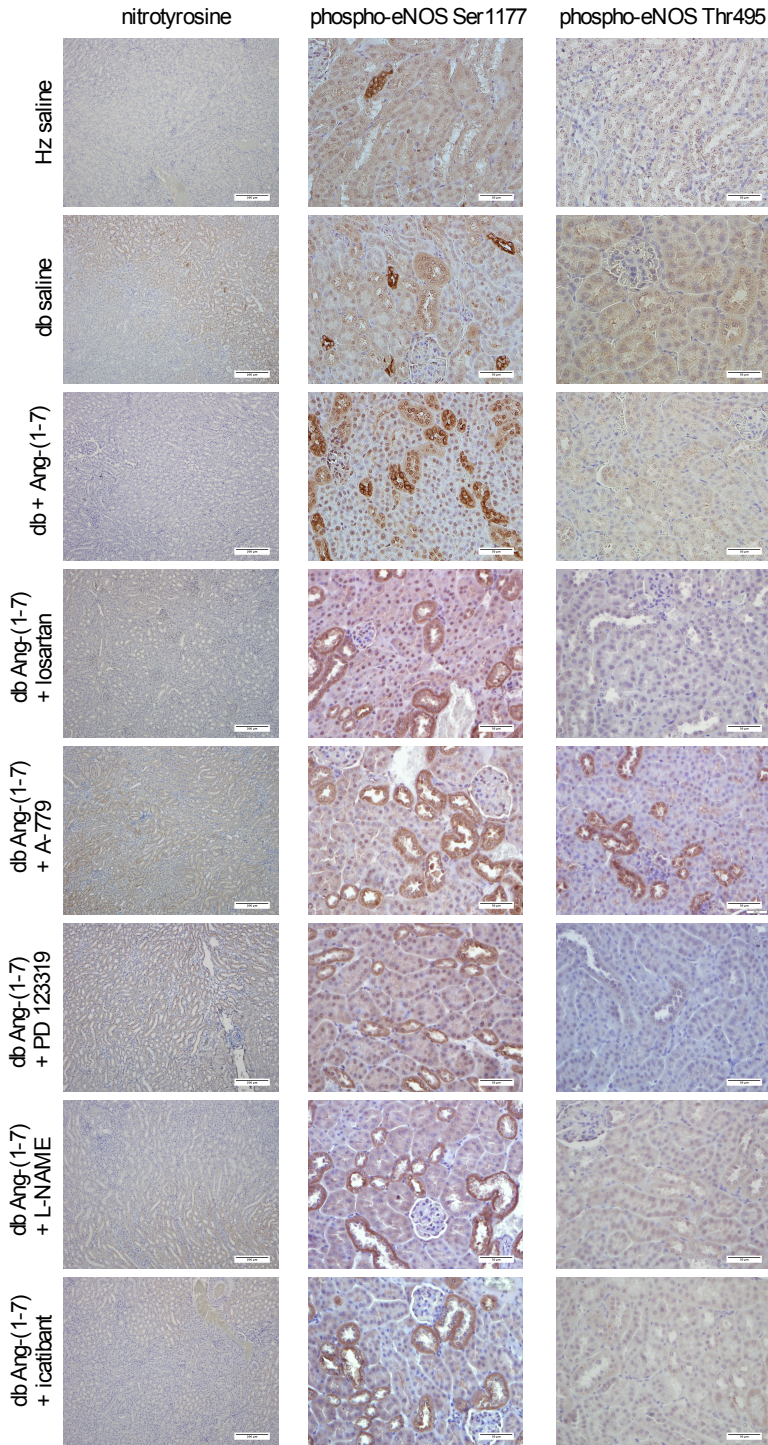

**Figure IV**

**Effects of inhibitors on bone marrow EPC in diabetic animals.**

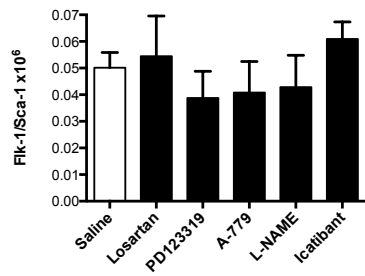

**Figure V**

**EPC flow cytometry analysis.** Representative images of flow cytometry analysis of circulating EPC.

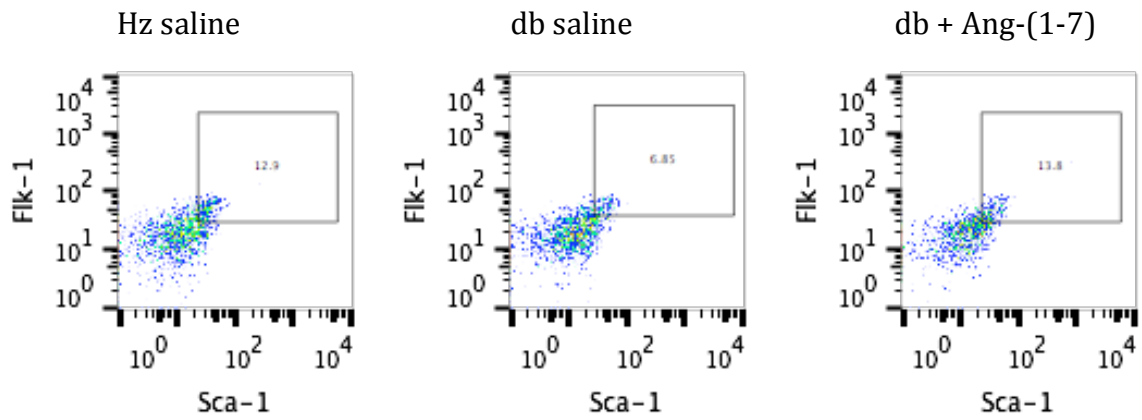

Supplement: bph0172-4443-sd1.pdf [file bph0172-4443-sd1.pdf]
